# Supplementary material
Source: publisher figshare collection journal article supplement (https://acs.figshare.com/ndownloader/files/5140663)

**Formation of Colloidal CuO Nanocrystallites and Their Spherical Aggregation and Reductive Transformation to Hollow Cu<sub>2</sub>O Nanospheres**

Yu Chang, Joong Jiat Teo, and Hua Chun Zeng\*  
*Department of Chemical and Biomolecular Engineering,  
Faculty of Engineering, National University of Singapore,  
10 Kent Ridge Crescent, Singapore 119260*

---

\* Corresponding author's email: [chezhc@nus.edu.sg](mailto:chezhc@nus.edu.sg)

# SI-1 A list of experiments conducted in the present work\*

| Sample No. | [Cu <sup>2+</sup> ] | Temperature (°C) | Time (h) |
|------------|---------------------|------------------|----------|
| 1          | 0.010               | 150              | 4        |
| 2          | 0.010               | 150              | 9        |
| 3          | 0.010               | 150              | 14       |
| 4          | 0.010               | 150              | 23       |
| 5          | 0.010               | 150              | 35       |
| 6          | 0.010               | 150              | 50       |
| 7          | 0.010               | 160              | 2        |
| 8          | 0.010               | 160              | 4        |
| 9          | 0.010               | 160              | 10       |
| 10         | 0.010               | 160              | 15       |
| 11         | 0.010               | 160              | 27       |
| 12         | 0.010               | 160              | 40       |
| 13         | 0.010               | 170              | 1.5      |
| 14         | 0.010               | 170              | 3.25     |
| 15         | 0.010               | 170              | 4        |
| 16         | 0.010               | 170              | 6        |
| 17         | 0.010               | 180              | 2        |
| 18         | 0.010               | 180              | 3        |
| 19         | 0.005               | 180              | 4        |
| 20         | 0.010               | 180              | 4        |
| 21         | 0.010               | 180              | 7        |
| 22         | 0.010               | 180              | 8        |
| 23         | 0.010               | 180              | 9        |
| 24         | 0.010               | 180              | 10       |
| 25         | 0.010               | 180              | 12       |
| 26         | 0.010               | 180              | 13       |
| 27         | 0.010               | 180              | 14       |
| 28         | 0.010               | 180              | 15       |
| 29         | 0.010               | 180              | 17       |
| 30         | 0.010               | 180              | 20       |
| 31         | 0.010               | 180              | 25       |
| 32         | 0.010               | 180              | 30       |
| 33         | 0.010               | 180              | 33       |
| 34         | 0.010               | 180              | 36       |
| 35         | 0.010               | 150 + 180        | 22 + 8   |
| 36         | 0.010               | 150 + 180        | 22 + 10  |
| 37         | 0.010               | 150 + 180        | 22 + 11  |
| 38         | 0.010               | 150 + 180        | 24 + 8   |
| 39         | 0.010               | 150 + 180        | 24 + 10  |
| 40         | 0.010               | 150 + 180        | 24 + 11  |
| 41         | 0.010               | 150 + 180        | 26 + 42  |
| 42         | 0.010               | 140 + 180        | 40 + 8   |

\* A series of experiments with copper ion molar concentration [Cu<sup>2+</sup>] > 0.010 M had also been conducted in the present work. However, they could not produce nano-sized Cu<sub>2</sub>O products, and these data are therefore not included in the above table.

## SI-2 XRD results of samples synthesized at 150 °C

The following XRD patterns show the phase transformation of CuO to Cu<sub>2</sub>O at 150 °C.

Synthetic conditions: the samples were prepared after different reactions times (4 h to 50 h) at 150 °C with 30 mL of starting solution ( $[\text{Cu}^{2+}] = 0.010 \text{ M}$ ). Symbol \* indicates the diffraction peaks from unconverted CuO phase.

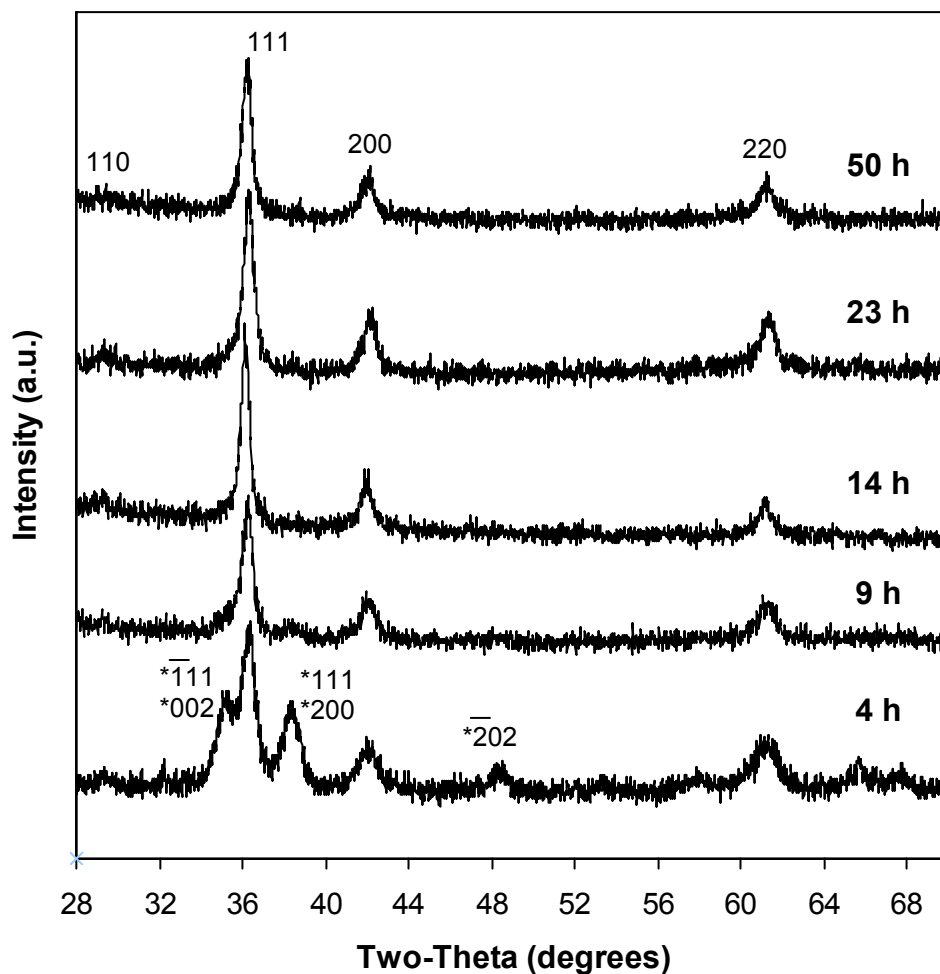

### SI-3 XRD results of samples synthesized at 160 and 170 °C

The following XRD patterns show the phase transformation of CuO to Cu<sub>2</sub>O at 160 and 170 °C respectively. Synthetic conditions: the samples were prepared after different reactions times at 160 and 170 °C respectively with 30 mL of starting solution ( $[\text{Cu}^{2+}] = 0.010 \text{ M}$ ).

Symbol \* indicates the diffraction peaks from initial CuO phase.

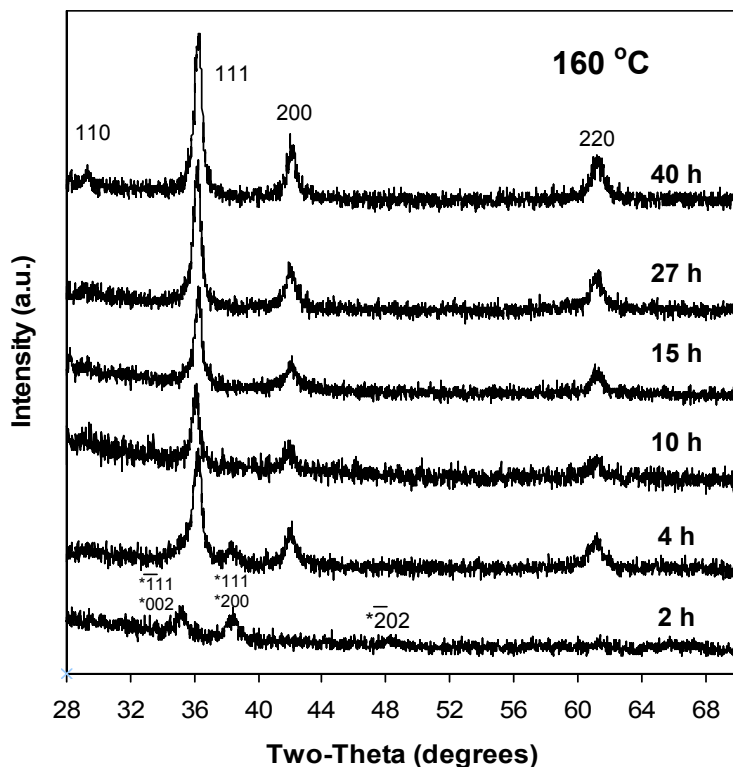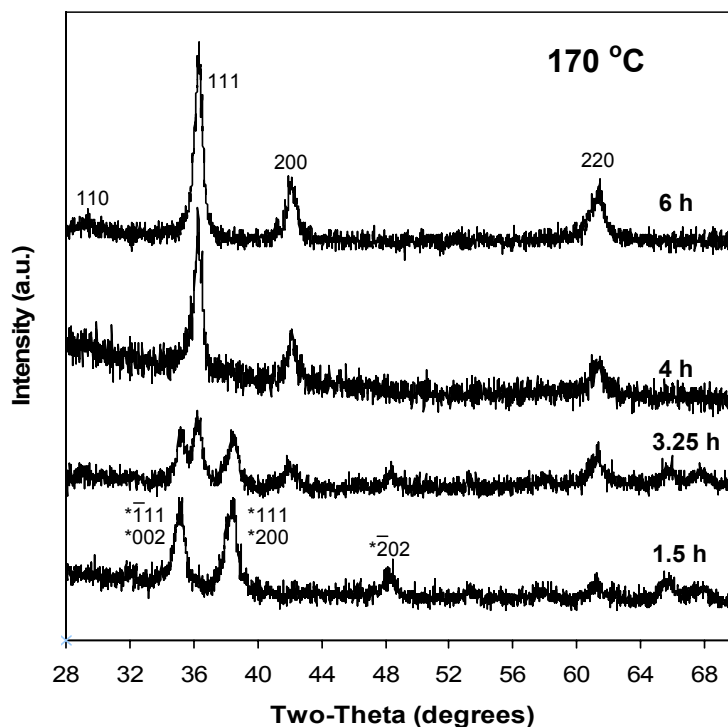

#### SI-4 TEM results of samples synthesized at 160 and 170 °C

The following TEM images show morphological changes of the prepared sample at 160 and 170 °C respectively; refer to the above XRD results (SI-3) for their respective crystallographic information. Synthetic conditions: the samples were prepared after different reactions times at 160 and 170 °C respectively with 30 mL of starting solution ( $[\text{Cu}^{2+}] = 0.010 \text{ M}$ ).

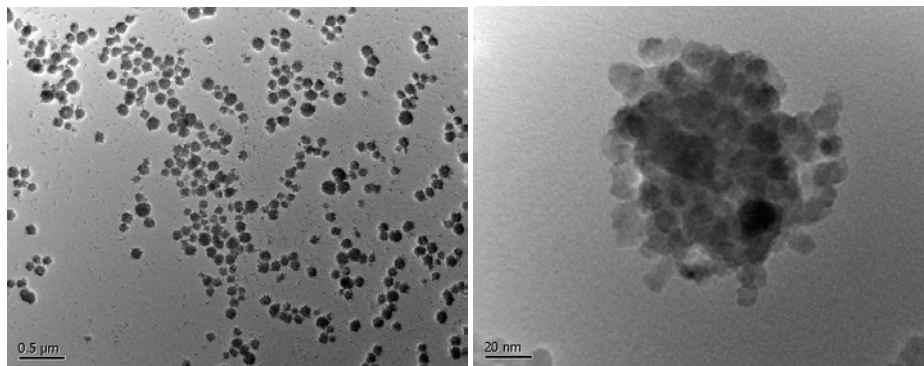

Experimental condition: 160 °C for 4 h.

Solid phases:  $\text{Cu}_2\text{O}$  (major) +  $\text{CuO}$  (XRD results, SI-3).

Left image: overall distribution of the aggregates.

Right image: an individual aggregate (one of those in the left image) which contains smaller crystallites.

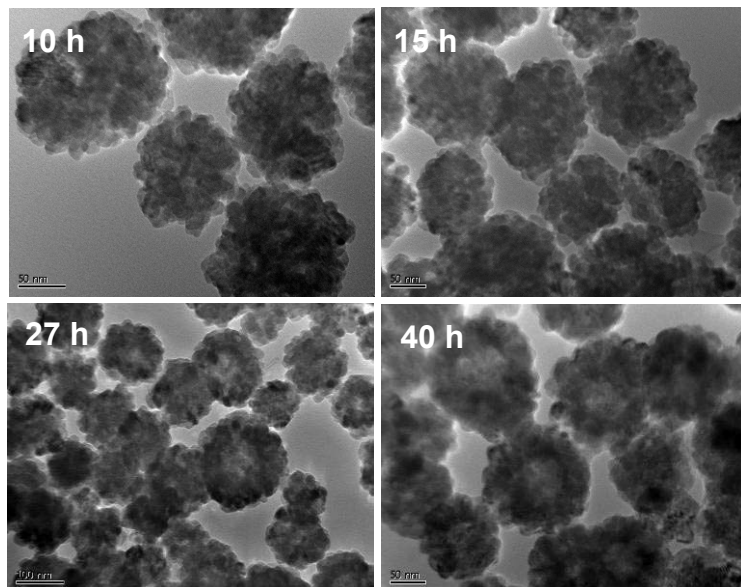

Experimental conditions: 160 °C for 10 h, 15 h, 27 h, and 40 h.

Solid phase:  $\text{Cu}_2\text{O}$  (XRD results, SI-3).

All images: a hollowing process of the  $\text{Cu}_2\text{O}$  nanospheres.

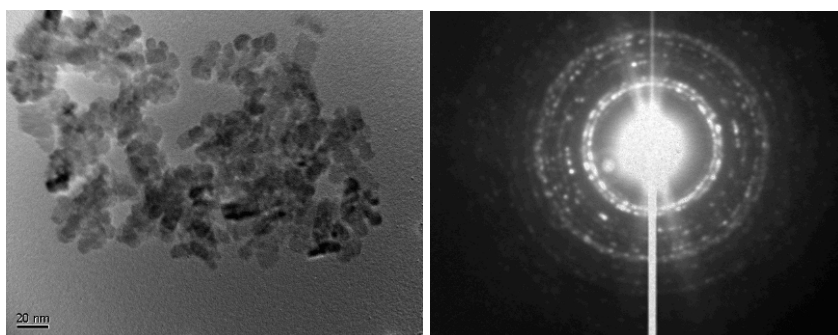

Experimental condition: 170 °C for 1.5 h.  
Solid phase: CuO (also see XRD results, SI-3).  
Left image: weakly aggregating CuO crystallites.  
Right image: a SAED pattern of the CuO crystallites.

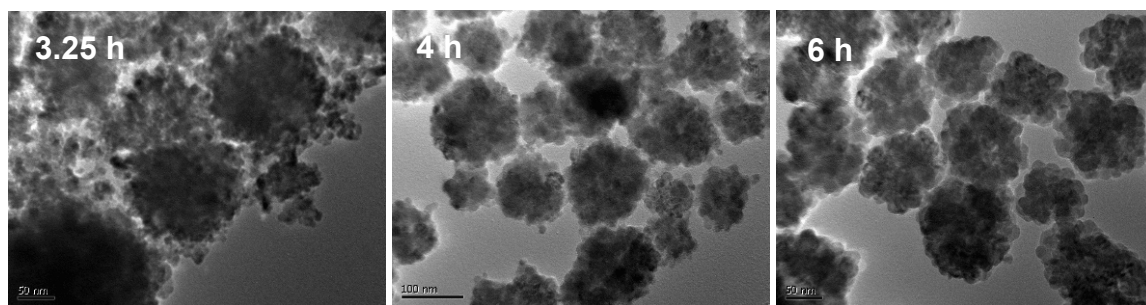

Experimental conditions: 170 °C for 3.25 h, 4 h, and 6 h.  
Solid phase(s): Cu<sub>2</sub>O + CuO (3.25 h); Cu<sub>2</sub>O (4 h and 6 h; see XRD results, SI-3).  
All images: an aggregation process for formation of solid Cu<sub>2</sub>O nanospheres.

### SI-5 XRD results of samples synthesized at 180 °C

The following XRD patterns show the phase transformation of CuO to Cu<sub>2</sub>O at 180 °C.

Synthetic conditions: the samples were prepared after different reactions times (2 h to 20 h) at 180 °C with 30 mL of starting solution ( $[\text{Cu}^{2+}] = 0.010 \text{ M}$ ). Symbol \* indicates the diffraction peaks from initial CuO phase, and symbol \*\* indicates the diffraction peaks from the metallic Cu phase formed during the final deep reduction.

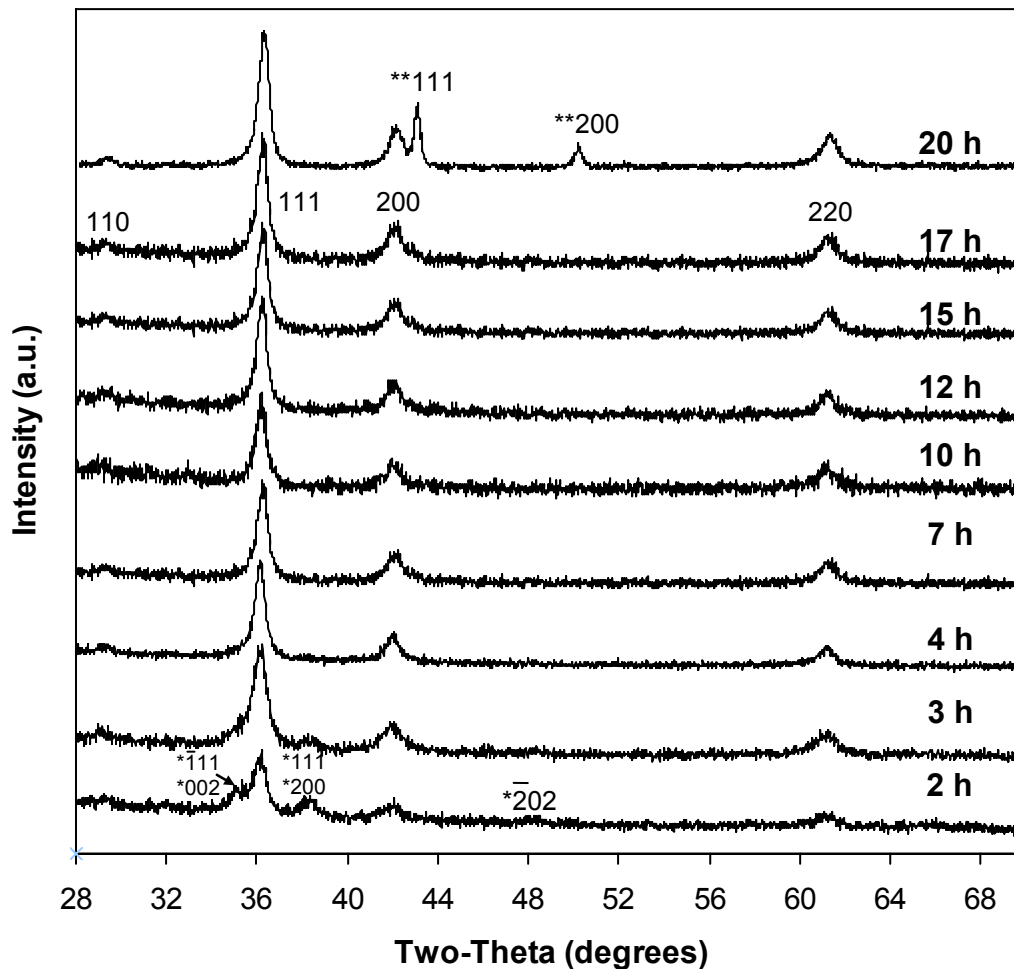

### SI-6 XRD results of samples synthesized with the two-step approach

Representative XRD patterns of hollow  $\text{Cu}_2\text{O}$  nanospheres synthesized with the two-step method: (A)  $150^\circ\text{C}$  for 22 h +  $180^\circ\text{C}$  for 8 h; (B)  $150^\circ\text{C}$  for 22 h +  $180^\circ\text{C}$  for 10 h; (C)  $150^\circ\text{C}$  for 22 h +  $180^\circ\text{C}$  for 11 h; (D)  $150^\circ\text{C}$  for 24 h +  $180^\circ\text{C}$  for 8 h; (E)  $150^\circ\text{C}$  for 24 h +  $180^\circ\text{C}$  for 10 h; and (F)  $150^\circ\text{C}$  for 24 h +  $180^\circ\text{C}$  for 11 h. Symbol \*\* indicates the diffraction peaks from the metallic Cu phase formed during the final deep reduction. Synthetic conditions: starting solution  $[\text{Cu}^{2+}] = 0.010\text{ M}$ , 30 mL.

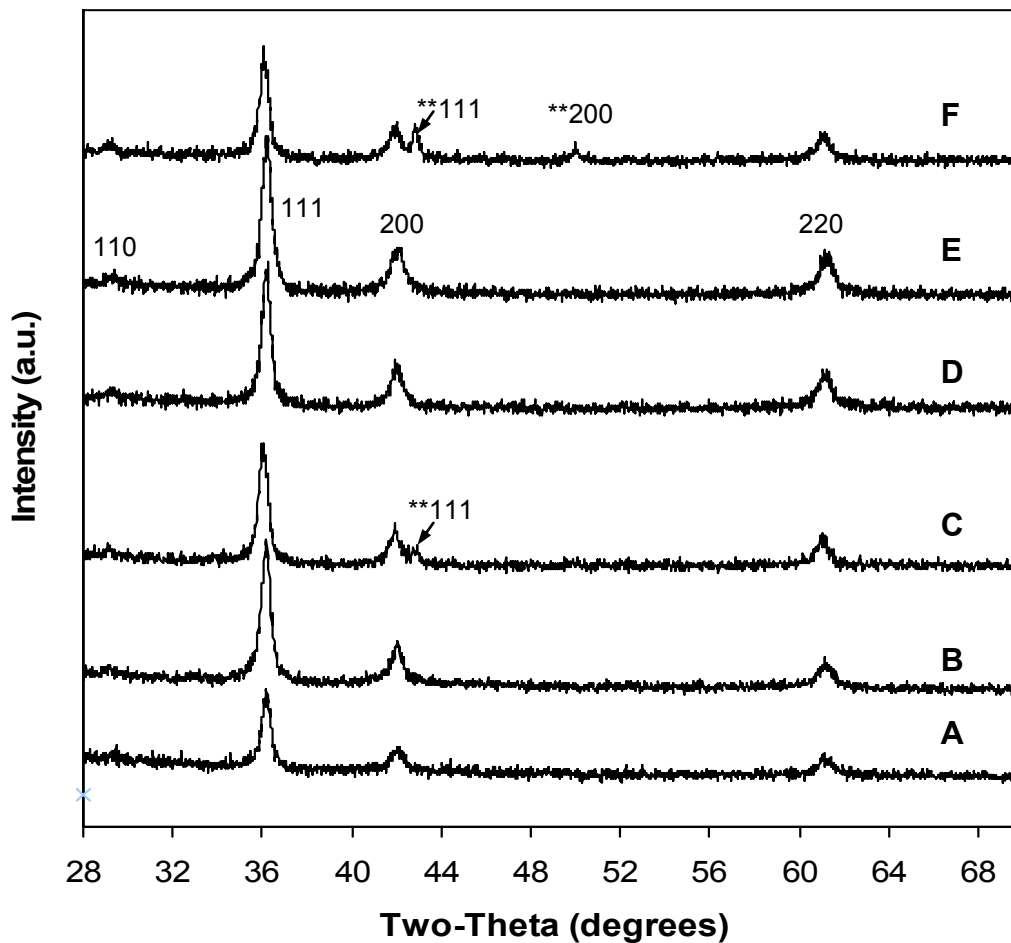



## SI-7 SEM observations for samples synthesized with single-step and two-step approaches: 100% morphological yield in hollow Cu<sub>2</sub>O nanospheres

### *Single-step synthesis:*

The following SEM image shows that the phase-pure Cu<sub>2</sub>O hollow nanospheres (Its XRD pattern is shown in SI-2: 50 h) are highly regulated with a 100% morphological yield.

Synthetic condition: the sample was prepared with a single-step heating routine at 150 °C for 50 h; starting solution [Cu<sup>2+</sup>] = 0.010 M, 30 mL.

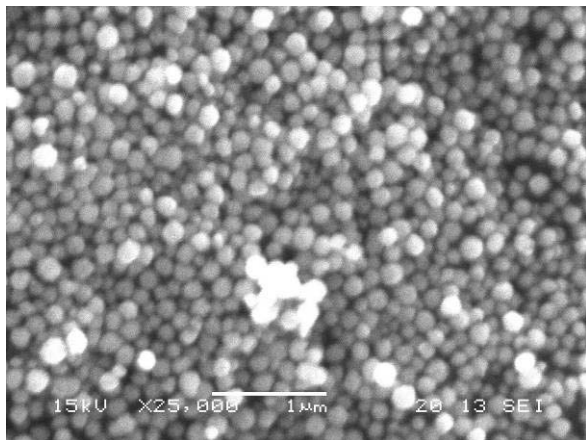

### *Two-step synthesis:*

The following two SEM images also show that the Cu<sub>2</sub>O hollow nanospheres are also highly regulated with a 100% morphological yield even with a small amount of metallic copper detected by XRD (F, SI-6). Synthetic condition: the sample was prepared with a two-step heating routine at 150 °C for 24 h + 180 °C for 11 h; starting solution [Cu<sup>2+</sup>] = 0.010 M, 30 mL.

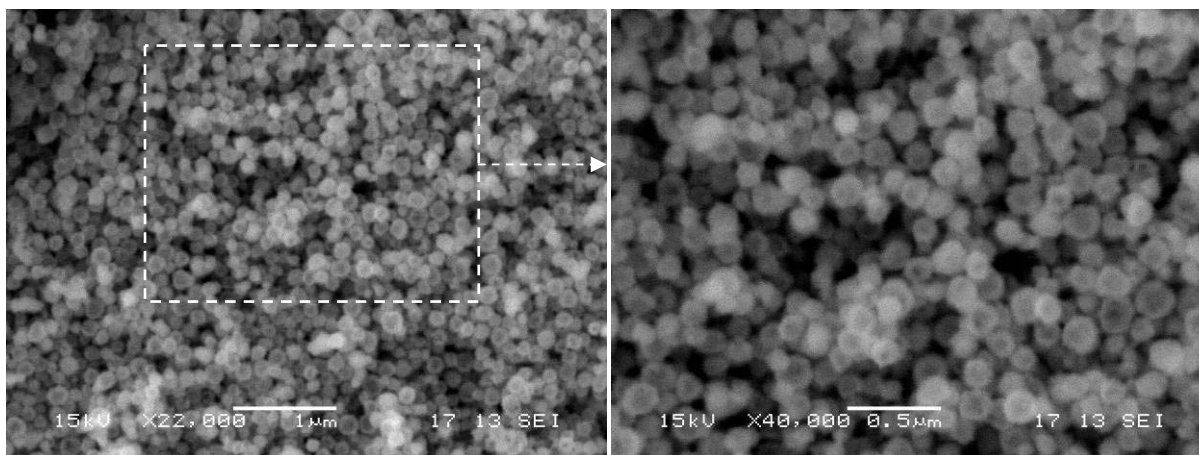

### SI-8 UV-Visible absorption spectra

The following representative UV-Visible absorption spectra were measured for four  $\text{Cu}_2\text{O}$  samples synthesized at  $180^\circ\text{C}$  for 4, 7, 10, and 14 h, respectively (also see Figure 6B in the main text). The samples were dilute in ethanol solvent in these measurements.

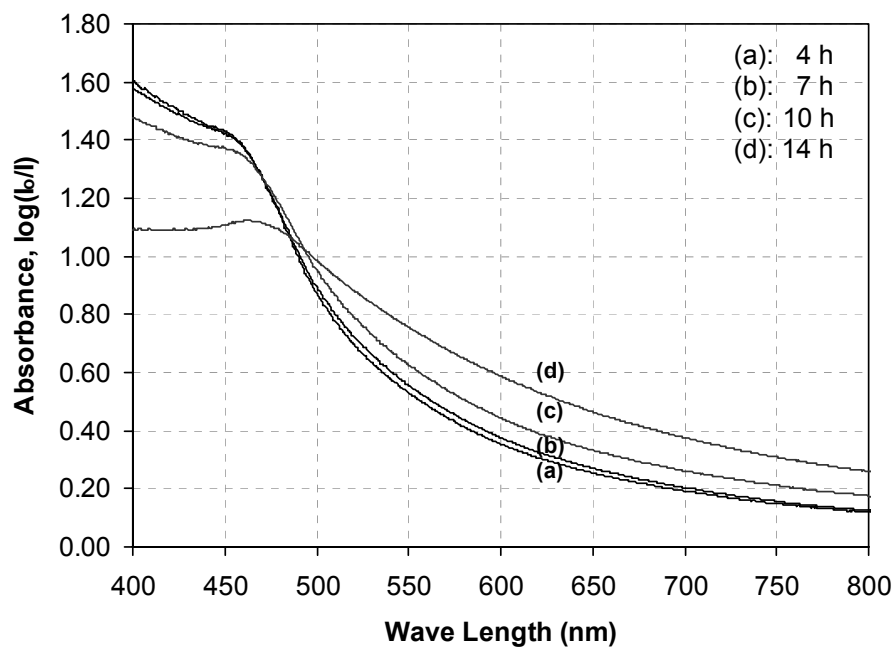

Supplement: Supplementary file 1 [file 5140663]
